# Supplementary material for: Implications of sea-ice biogeochemistry for oceanic production and emissions of dimethylsulfide in the Arctic
Source: Copernicus journal article supplement (doi:10.5194/bg-2016-399), 2016-10-04
Supplement: Supplementary file [file bg-2016-399-AC5-supplement.pdf]

# Supplementary material for Hayashida et al.

March 3, 2017

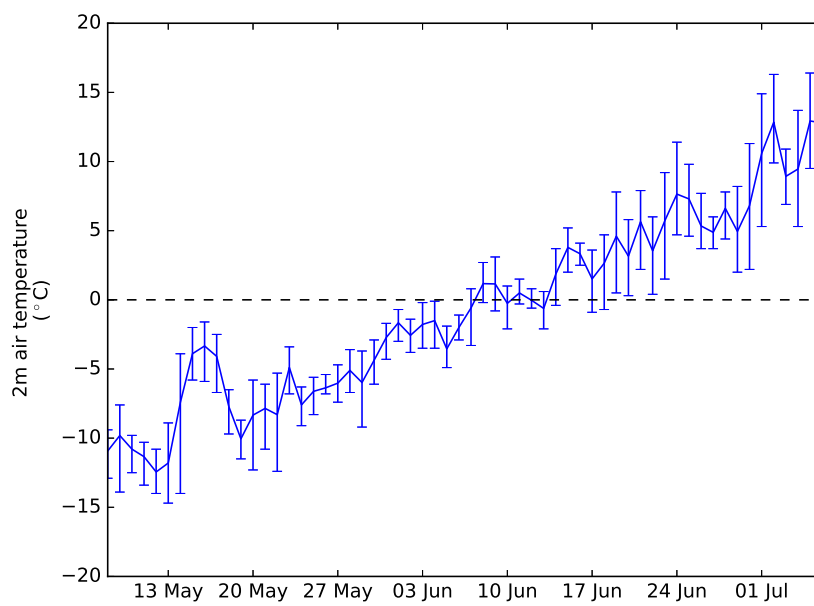

Figure S1: Time series of daily mean surface 2-m air temperature observed at Resolute airport during 2010. The upper and lower vertical bars associated with the daily mean values represent the daily maximum and minimum values, respectively.

(a) Standard

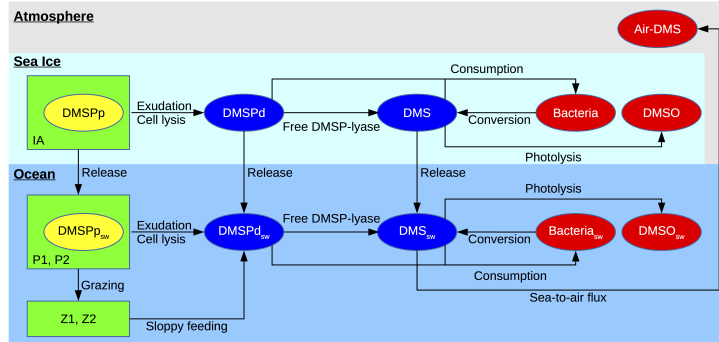

(b) NoIceSul

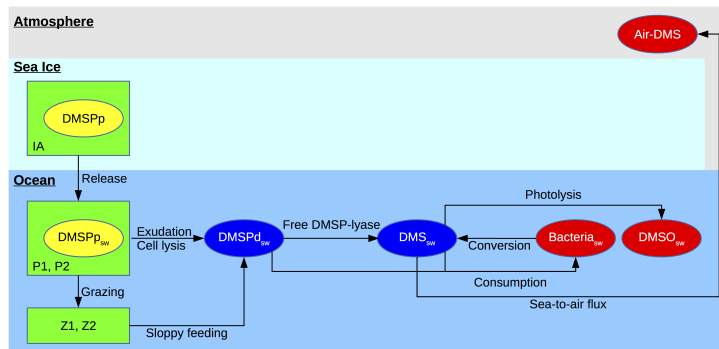

(c) NoIceBgc

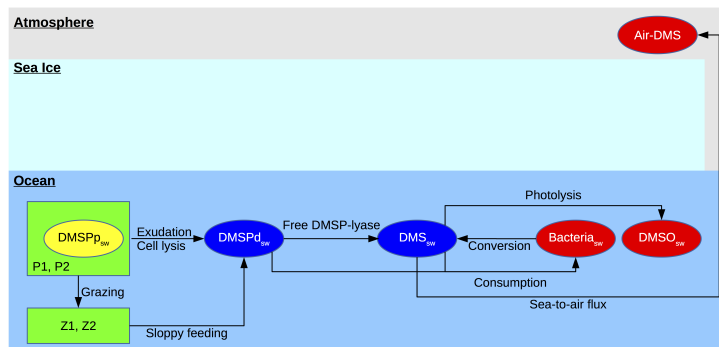

Figure S2: Comparison of model schematic among (a) the standard run, (b) the NoIceSul run, and (c) the NoIceBgc run.
